# Supplementary material
Source: publisher figshare collection journal article supplement (https://karger.figshare.com/articles/dataset/_/5129266)

**Supplementary figure 2. Histopathology of the liver of wild-type, *gzmA*<sup>-/-</sup>, *gzMB*<sup>-/-</sup> and *gzMAxB*<sup>-/-</sup> mice 48h after infection with *K. pneumoniae*.** Mice were infected with 4\*10<sup>3</sup> CFU *K. pneumoniae* intranasally. Semi-quantitative histology scores of interstitial inflammation (a), percentage of hepatocellular necrosis (b) and number of thrombi (c) are represented. Data are box-and-whisker diagrams depicting the smallest observation, lower quartile, median, upper quartile and largest observation. N = 7-8 per group.

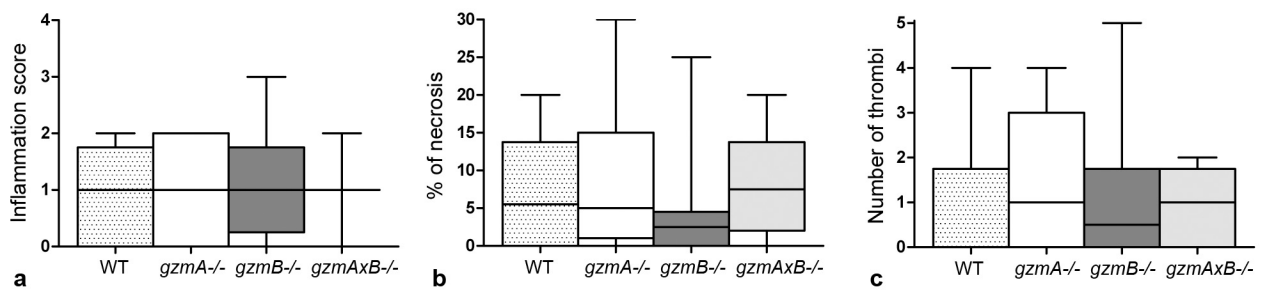

Supplement: Supplementary file 1 [file 1]
