# Supplementary material
Source: publisher figshare collection journal article supplement (https://karger.figshare.com/articles/dataset/_/5129266)

**Supplementary figure 1. Gating strategy for the analysis of the expression of granzymes A and B by lymphocyte populations in wild-type mice.** Intracellular expression of grzmA and B by lymphocyte populations was analyzed in lung (a) and blood (b) from wild-type mice by flow cytometry. Live cells were gated on the basis of forward (FSC) and side scattering (SSC) characteristics. CD8<sup>+</sup> T (CD3<sup>+</sup>CD8<sup>+</sup>), CD4<sup>+</sup> T (CD3<sup>+</sup>CD4<sup>+</sup>),  $\gamma\delta$  T (CD3<sup>+</sup> $\gamma\delta$  TCR<sup>+</sup>), NK1.1<sup>+</sup> T (CD3<sup>+</sup>NK1.1<sup>+</sup>) and NK (CD3<sup>-</sup>NK1.1<sup>+</sup>) cells were identified by dot-plots. The percentage of grzm<sup>+</sup> cells in each lymphocyte population as well as the MFI of the positive expression were determined in histogram plots. Data shown are from a representative individual.

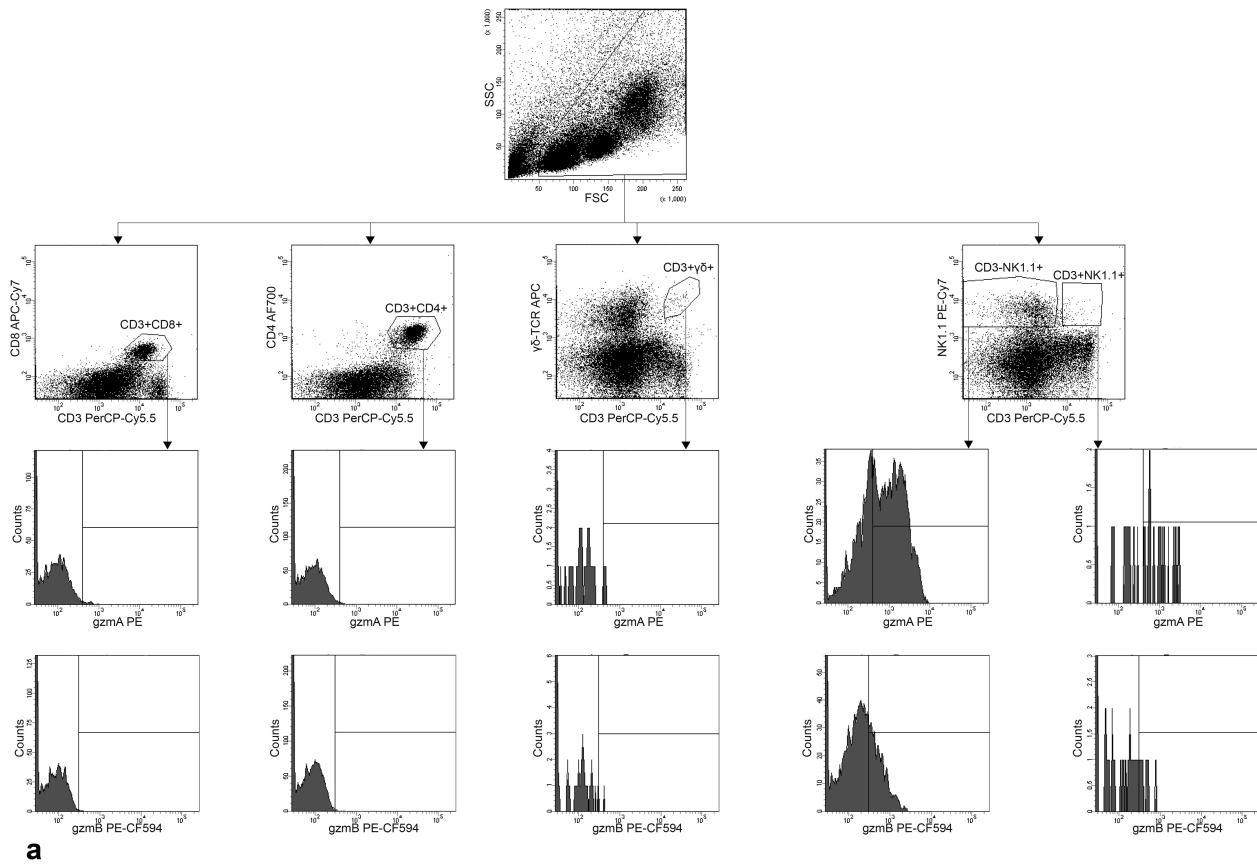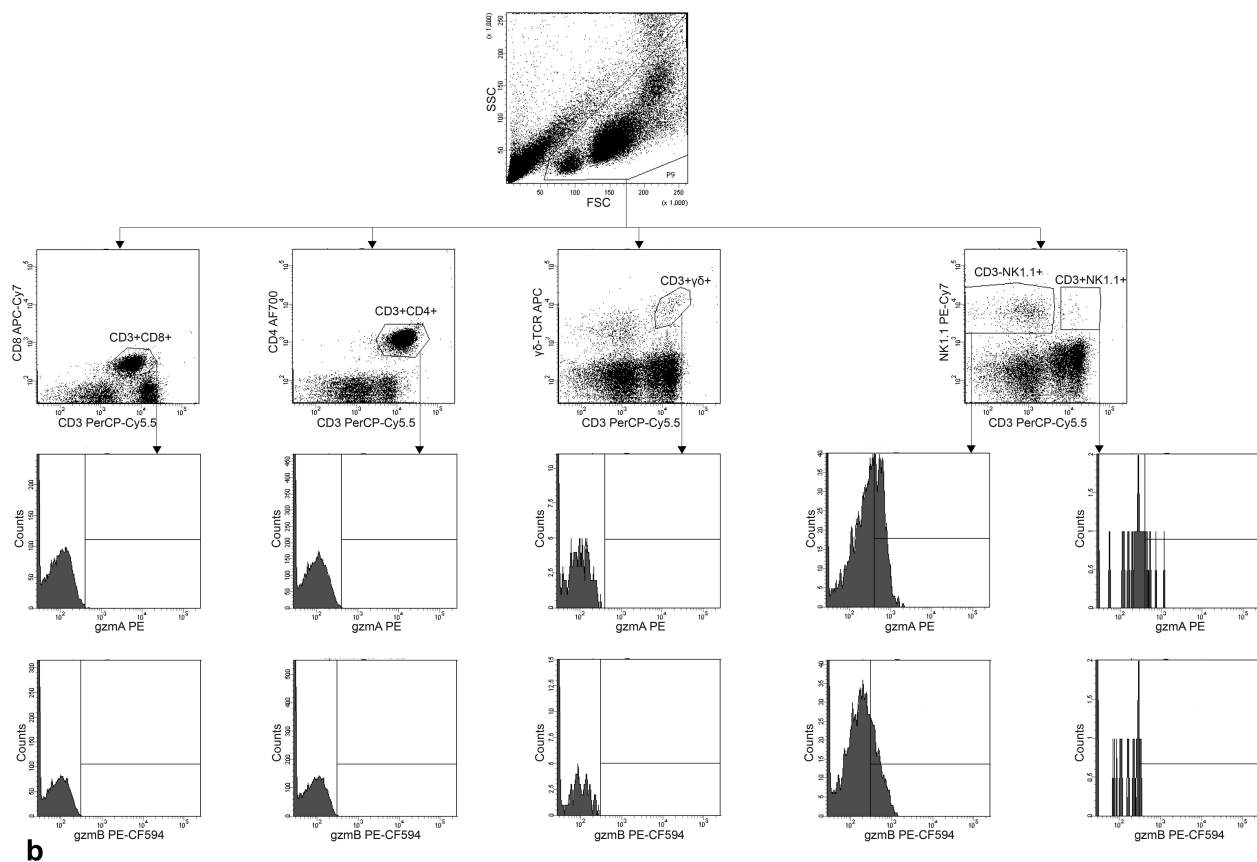

Supplement: Supplementary file 2 [file 1]
